# Supplementary material
Source: PubMed Central journal article supplement (PMC3902975)
Supplement: NIHMS542686-supplement-01.pdf [file NIHMS542686-supplement-01.pdf]

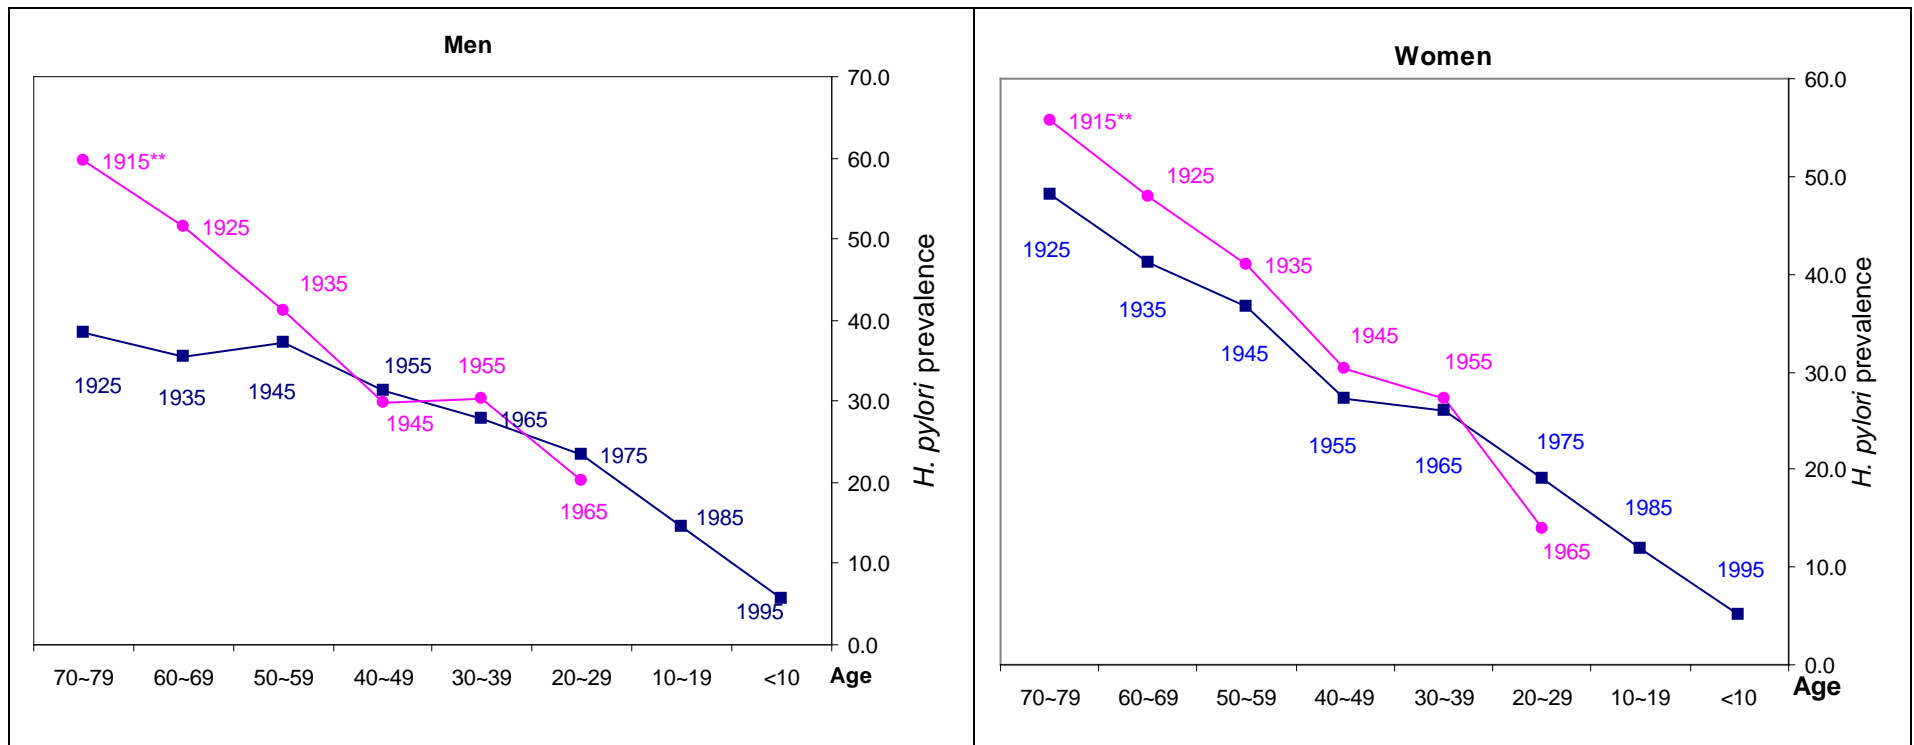

**Supplemental Fig 1. Age-specific *H. pylori* prevalence in NHANES III Phase I (1988-1991) and NHANES 1999-2000, by age and year of birth.** Data are shown as the NHANES III (●) and NHANES 1999-2000 (■). \*\*Year of birth is shown at the midpoint of decadal birth categories.

Prevalence for participants  $\leq 19$  years of age was not available in NHANES III. For consistency, we did not consider the *H. pylori* *cagA* IgG ELISA testing results in NHANES III and participants with an immune status ratio 0.91-1.09 in NHANES 1999-2000.

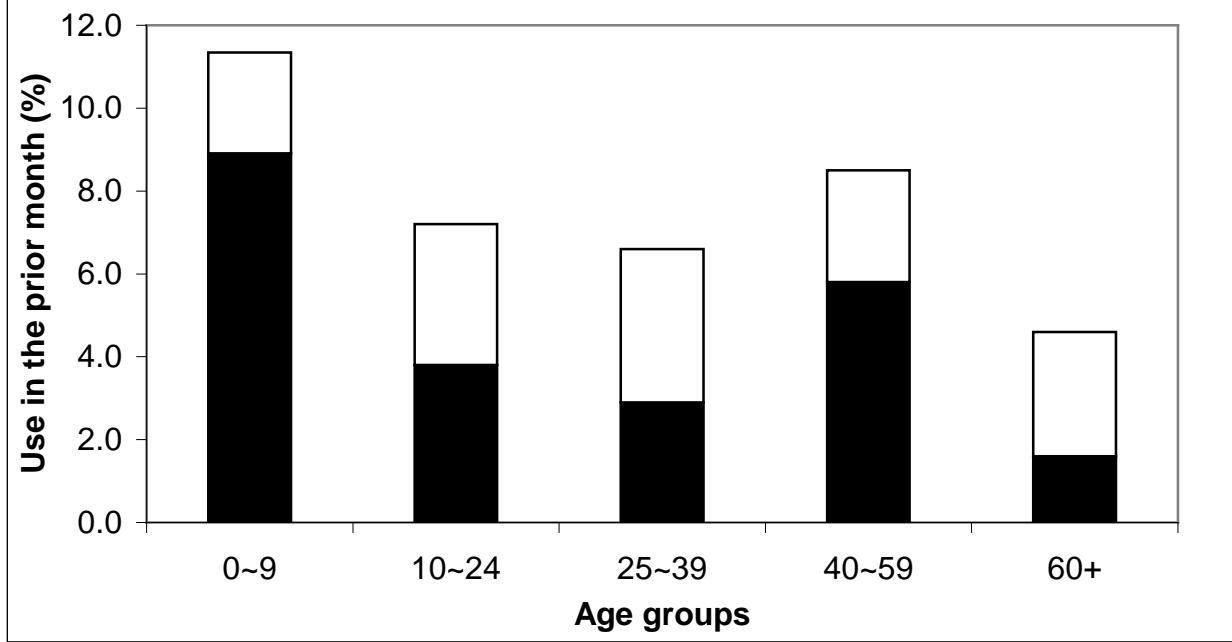

**Supplemental Fig 2. Use of antibiotics in prior month, as reported by 9,965 subjects, NHANES 1999-2000.** Data are shown as all use of antibiotics (total columns) and use of  $\beta$ -lactam antibiotics (■). All penicillins and cephalosporins were considered  $\beta$ -lactam antibiotics.

**Supplemental Table 1. Association of *H. pylori* status with asthma and allergic rhinitis, with additional control for socioeconomic status indicators †**

| Age group/Outcome                      | All                                                                   | Age 3 – 19                                                            | Age 3 – 13                                                            | Age 14 – 19                                                           |
|----------------------------------------|-----------------------------------------------------------------------|-----------------------------------------------------------------------|-----------------------------------------------------------------------|-----------------------------------------------------------------------|
|                                        | OR (95% CI) for outcome associated with <i>H. pylori</i> positivity * | OR (95% CI) for outcome associated with <i>H. pylori</i> positivity * | OR (95% CI) for outcome associated with <i>H. pylori</i> positivity * | OR (95% CI) for outcome associated with <i>H. pylori</i> positivity * |
| <b>Total</b>                           |                                                                       |                                                                       |                                                                       |                                                                       |
| Asthma                                 |                                                                       |                                                                       |                                                                       |                                                                       |
| Never                                  |                                                                       |                                                                       |                                                                       |                                                                       |
| Ever                                   | 0.89 (0.66-1.18)                                                      | 0.71 (0.43-1.17)                                                      | 0.46 (0.26-0.84)                                                      | 0.92 (0.67-1.25)                                                      |
| Ever, age at onset < 5†                |                                                                       | 0.52 (0.31-0.86)                                                      |                                                                       |                                                                       |
| Ever, age at onset ≥ 5†                |                                                                       | 0.95 (0.47-1.93)                                                      |                                                                       |                                                                       |
| Current or attack last year            | 0.69 (0.43-1.11)                                                      | 0.82 (0.44-1.50)                                                      | 0.41 (0.21-0.80)                                                      | 1.10 (0.54-2.24)                                                      |
| Allergic rhinitis in prior year        |                                                                       |                                                                       |                                                                       |                                                                       |
| No                                     |                                                                       |                                                                       |                                                                       |                                                                       |
| Yes                                    |                                                                       | 0.59 (0.35-1.03)                                                      | 0.32 (0.16-0.62)                                                      | 0.93 (0.47-1.84)                                                      |
| Dermatitis, eczema, rash in prior year |                                                                       |                                                                       |                                                                       |                                                                       |
| No                                     |                                                                       |                                                                       |                                                                       |                                                                       |
| Yes                                    | 0.74 (0.55-0.99)                                                      |                                                                       |                                                                       |                                                                       |

\* ORs were adjusted for race-ethnicity, country of birth, age, sex, BMI, smoking status (for participants > 12 years old), educational attainment (for participants > 12 years old), antibiotic use in the prior month, corticosteroid use in the prior month, household income, medical insurance status, home ownership (rent, own, or other arrangement), and housing characteristics (trailer, single house attached to other houses, single unattached house, apartment). The reference group was *H. pylori*-negative persons.

† Cut-point was determined based on median onset age. Information on age at onset was missing for 6 participants who had ever had asthma.

‡ Allergic rhinitis in prior year, current status of asthma, and age at onset of asthma were ascertained only for participants ≤ 19 years of age. Stratified analysis was based on the median age (13 years) among participants ≤ 19 years.

**Supplemental Table 2. Association of *H. pylori* status with asthma and allergic rhinitis, with additional control for Herpes Simplex I and Toxoplasma serum antibody status †**

| Age group/Outcome                      | <i>H. pylori</i> |      | OR (95% CI) for outcome associated with <i>H. pylori</i> positivity * | OR (95% CI) for outcome associated with <i>H. pylori</i> positivity † |
|----------------------------------------|------------------|------|-----------------------------------------------------------------------|-----------------------------------------------------------------------|
|                                        | -                | +    |                                                                       |                                                                       |
| <b>Age 14-49</b>                       | 2332             | 1264 |                                                                       |                                                                       |
| Asthma                                 |                  |      |                                                                       |                                                                       |
| Never had asthma                       | 1997             | 1129 |                                                                       |                                                                       |
| Ever had asthma                        | 335              | 135  | 0.87 (0.60-1.27)                                                      | 0.90 (0.61-1.31)                                                      |
| Had an asthma episode in prior year    | 110              | 45   | 0.75 (0.42-1.36)                                                      | 0.79 (0.43-1.46)                                                      |
| Dermatitis, eczema, rash in prior year |                  |      |                                                                       |                                                                       |
| No                                     | 2059             | 1165 |                                                                       |                                                                       |
| Yes                                    | 271              | 97   | 0.56 (0.37-0.84)                                                      | 0.55 (0.36-0.83)                                                      |
| Wheezing in prior year                 |                  |      |                                                                       |                                                                       |
| No                                     | 1998             | 1140 |                                                                       |                                                                       |
| Yes                                    | 333              | 121  | 0.65 (0.45-0.94)                                                      | 0.65 (0.44-0.95)                                                      |
| <b>Age 6-49</b>                        | 3507             | 1551 |                                                                       |                                                                       |
| Asthma                                 |                  |      |                                                                       |                                                                       |
| Never had asthma                       | 2982             | 1380 |                                                                       |                                                                       |
| Ever had asthma                        | 525              | 171  | 0.83 (0.59-1.16)                                                      | 0.83 (0.59-1.17)                                                      |
| Had an asthma episode in prior year    | 178              | 58   | 0.71 (0.42-1.21)                                                      | 0.71 (0.41-1.22)                                                      |
| Dermatitis, eczema, rash in prior year |                  |      |                                                                       |                                                                       |
| No                                     | 3180             | 1431 |                                                                       |                                                                       |
| Yes                                    | 892              | 118  | 0.56 (0.38-0.82)                                                      | 0.57 (0.39-0.83)                                                      |
| Wheezing in prior year                 |                  |      |                                                                       |                                                                       |
| No                                     | 3038             | 1401 |                                                                       |                                                                       |
| Yes                                    | 462              | 146  | 0.63 (0.45-0.89)                                                      | 0.63 (0.44-0.89)                                                      |
| <b>Age 6-13</b>                        | 1148             | 266  |                                                                       |                                                                       |
| Asthma                                 |                  |      |                                                                       |                                                                       |
| Never had asthma                       | 962              | 233  |                                                                       |                                                                       |
| Ever had asthma                        | 186              | 33   | 0.49 (0.30-0.80)                                                      | 0.46 (0.27-0.81)                                                      |
| Current asthma                         | 119              | 22   | 0.41 (0.24-0.69)                                                      | 0.36 (0.20-0.65)                                                      |
| Allergic rhinitis in prior year        |                  |      |                                                                       |                                                                       |
| No                                     | 1012             | 248  |                                                                       |                                                                       |

|     |     |    |                  |                  |
|-----|-----|----|------------------|------------------|
| Yes | 126 | 18 | 0.31 (0.17-0.57) | 0.31 (0.16-0.59) |
|-----|-----|----|------------------|------------------|

\* ORs were adjusted for race-ethnicity, country of birth, age, sex, BMI, smoking status (for participants > 12 years old), and educational attainment (for participants > 12 years old). The reference group was *H. pylori*-negative persons.

† ORs were additionally adjusted for Herpes I and Toxoplasma serum antibody status in participants 14-49 years old and Toxoplasma serum antibody status in participants 6-13 years old and 6-49 years old. Data on Herpes I only were available for participants 14-49 years of age. Data on Toxoplasma serum antibody status only were available for participants 6-49 years of age.

‡ Allergic rhinitis in prior year and current status of asthma were ascertained only for participants ≤ 19 years of age.
